# Supplementary material for: A membrane electrode assembly-type cell designed for selective CO production from bicarbonate electrolyte and air containing CO2 mixed gas
Source: Royal Society of Chemistry journal article supplement (doi:10.1039/d4ya00038b), 2024-01-01
Supplement: d4ya00038b1.pdf [file d4ya00038b1.pdf]

## Supplementary Information for

# Membrane electrode assembly type cell designed for selective CO production from bicarbonate electrolyte and air containing CO<sub>2</sub> mixed gas

Akina Yoshizawa,<sup>a</sup> Manabu Higashi<sup>a</sup> Akihiko Anzai<sup>a</sup> and Miho Yamauchi<sup>a,b,c,d\*</sup>

<sup>a</sup> Institute for Materials Chemistry and Engineering (IMCE), Kyushu University, Motooka 744, Nishi-ku, Fukuoka 819-0395, Japan.

<sup>b</sup> Advanced Institute for Materials Research (WPI-AIMR), Tohoku University 2-1-1 Katahira, Aoba-ku, Sendai 980-8577, Japan.

<sup>c</sup> Research Center for Negative Emissions Technologies (K-NETs), Kyushu University Motooka 744, Nishi-ku, Fukuoka 819-0395, Japan.

<sup>d</sup> International Institute for Carbon-Neutral Energy Research (WPI-I<sup>2</sup>CNER), Kyushu University Motooka 744, Nishi-ku, Fukuoka 819-0395, Japan.

\*Corresponding author:

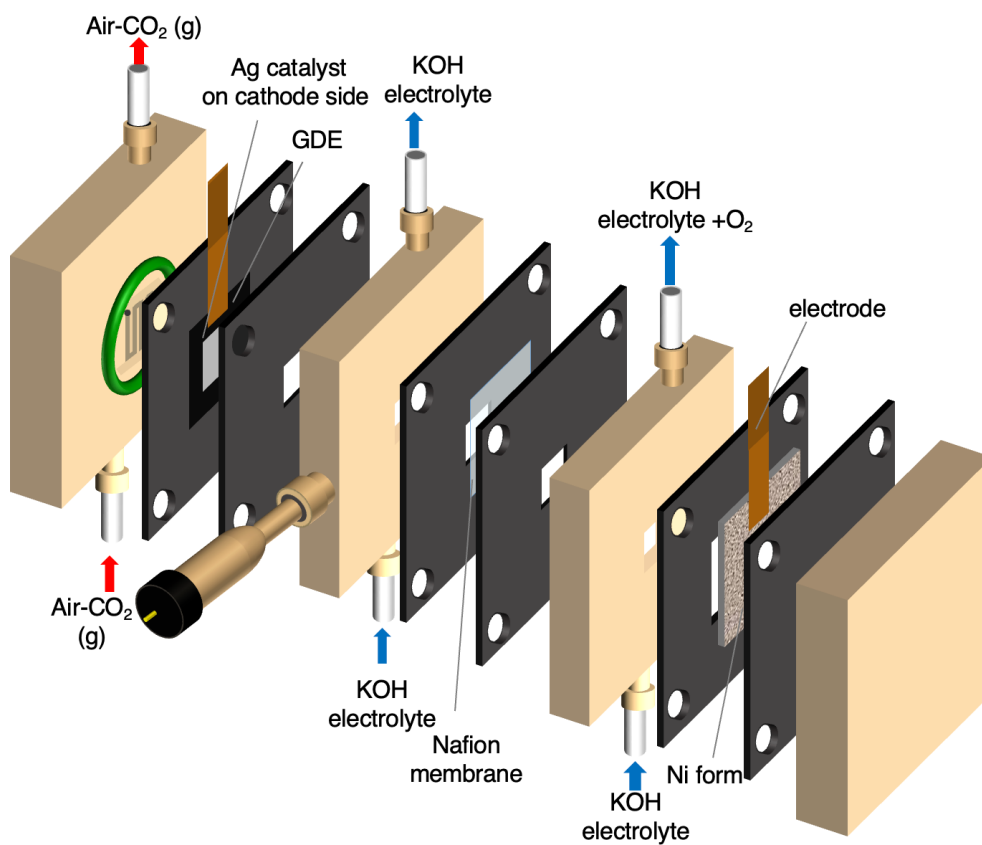

**Figure S1.** System configuration of conventional three-chamber cell.

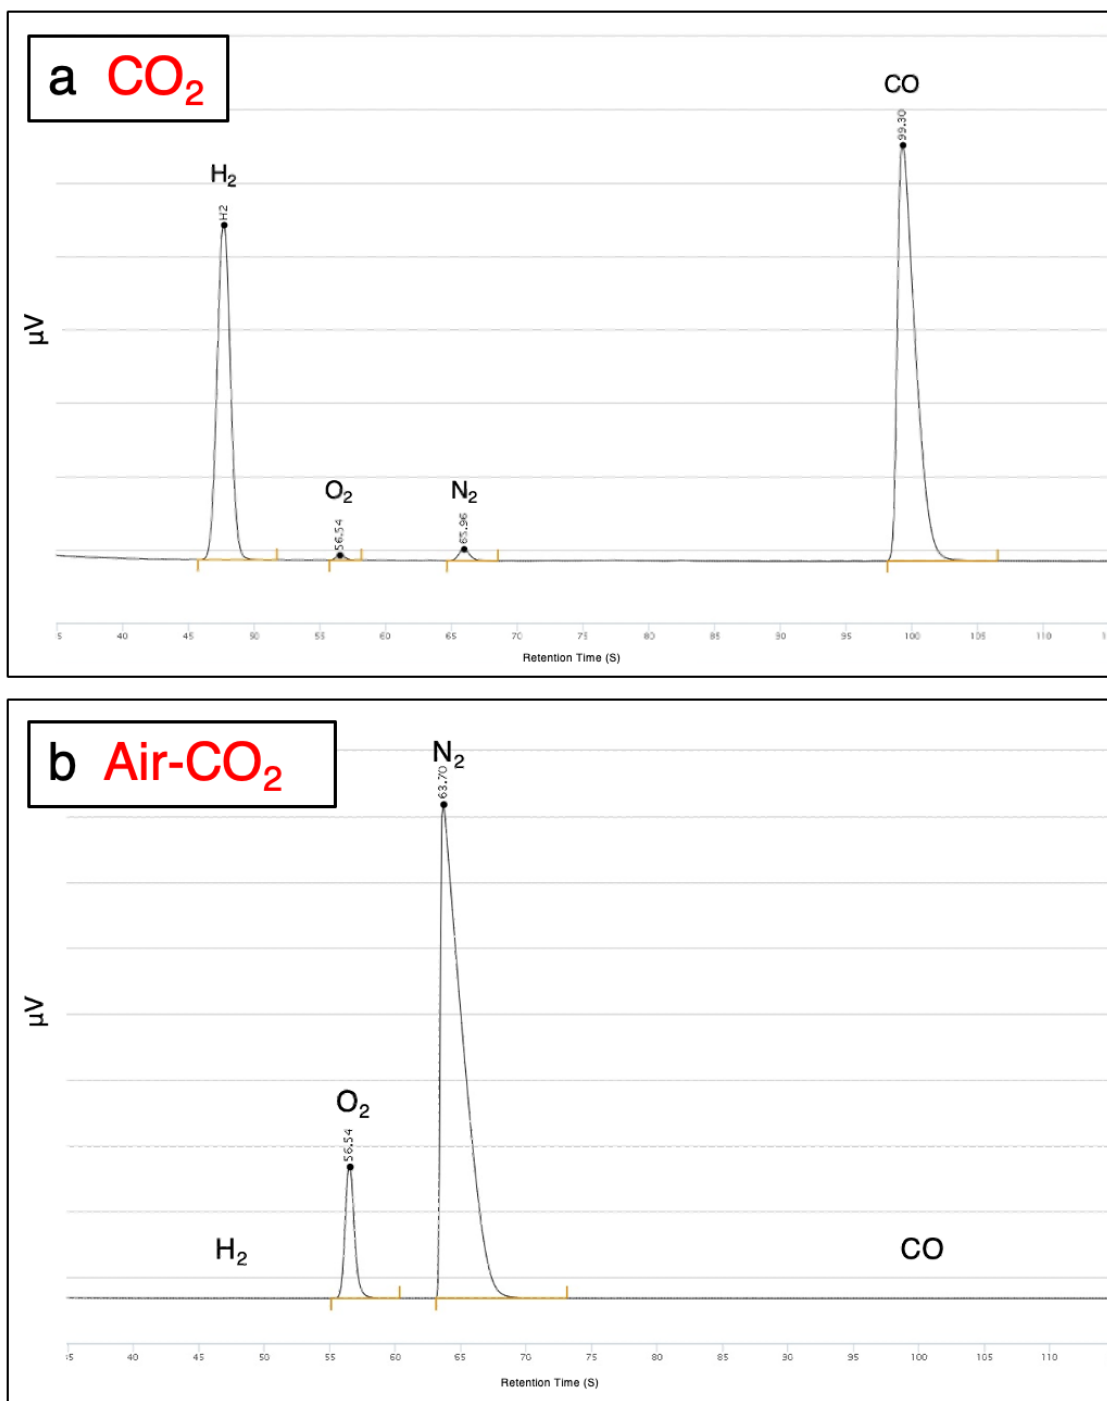

**Figure S2.** GC charts for the analysis of H<sub>2</sub> and CO produced in CO<sub>2</sub>RR using (a) CO<sub>2</sub> and (b) Air-CO<sub>2</sub> on a conventional carbon based flow cell.

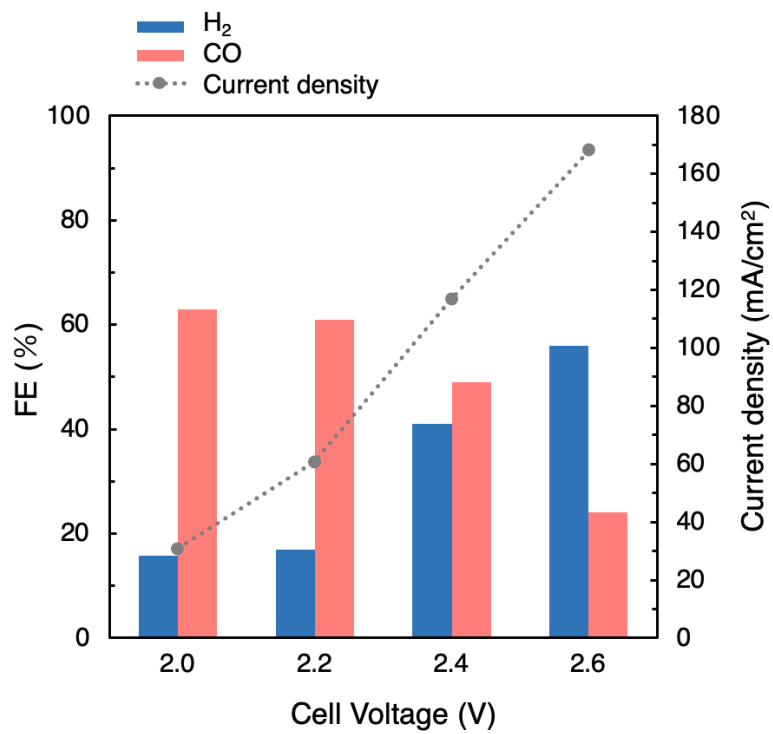

**Figure S3.** Faradaic efficiency (FE) in CO<sub>2</sub>RR using 1.0 M BCS on a MEA cell with a carbon-based GDE.

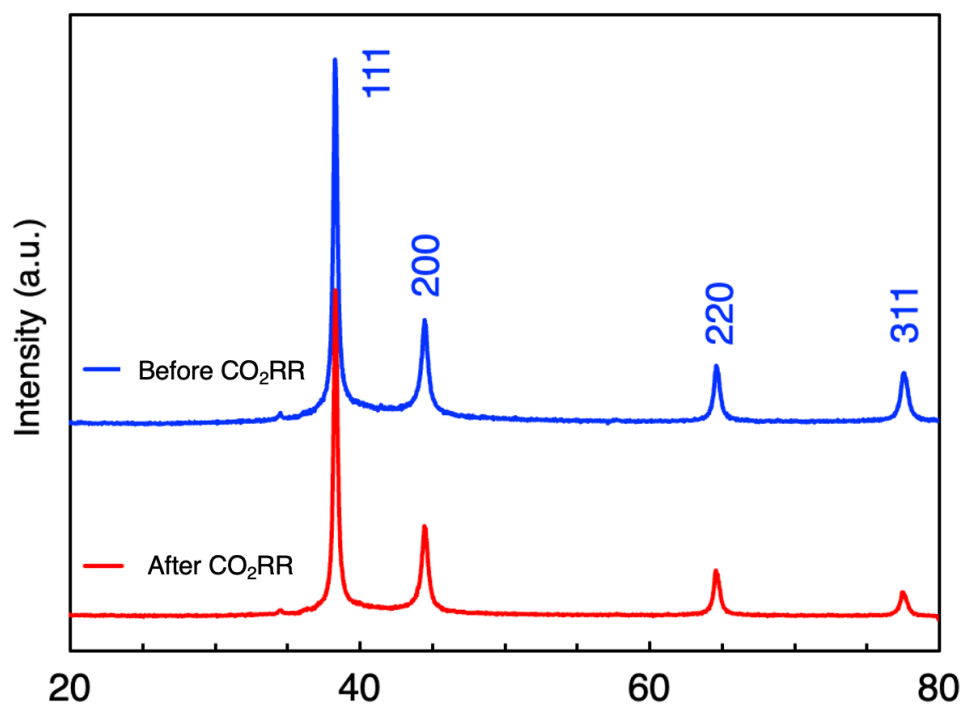

**Figure S4.** XRD diffraction patterns of the Ag NP catalyst on MEA before and after CO<sub>2</sub>RR using 1.0 M BCS.

**Table S1.** Crystallographic data and Rietveld refinement parameters of the Ag NP catalyst on MEA before and after CO<sub>2</sub>RR using 1.0 M BCS.

|                       | before reaction | after reaction |
|-----------------------|-----------------|----------------|
| crystal system        | cubic           | cubic          |
| space group           | Fm-3m           | Fm-3m          |
| a (Å)                 | 4.088           | 4.089          |
| V (Å <sup>3</sup> )   | 68.32           | 68.40          |
| crystallite size (nm) | 26.4            | 25.2           |
| T (K)                 | 298             | 298            |
| GOF                   | 2.32            | 3.09           |
| 2θ range              | 30-80°          | 30-80°         |
| wavelength (Å)        | 1.5405          | 1.5405         |

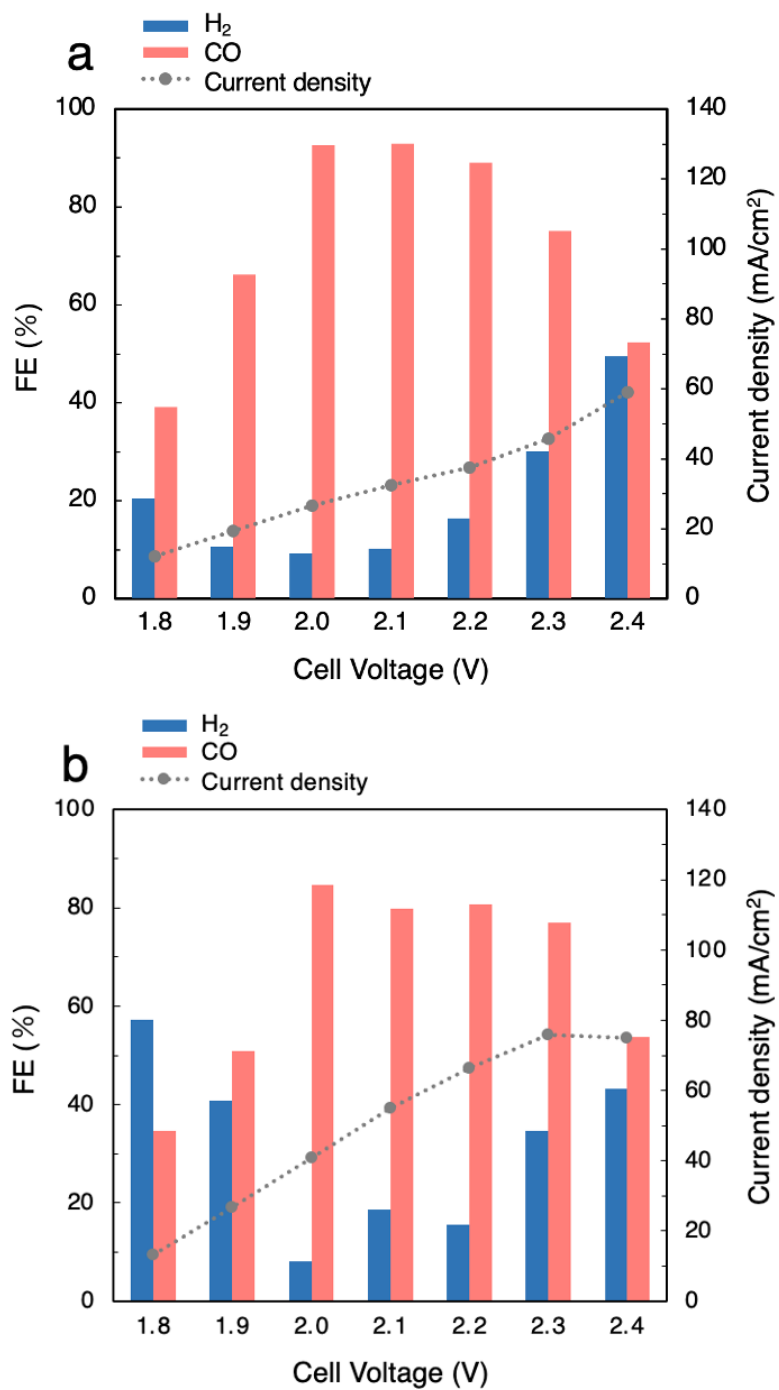

**Figure S5.** Faradaic efficiency (FE) and current density as a function of cell voltage for  $\text{CO}_2\text{RR}$  on Ag MEA-Cell in (a) 1.0M BCS and (b) 3.0M BCS.

**Table S2.** Electrolyte pH of the CO<sub>2</sub> capturing 1.0 M KOH.

| gas                      | pH                |
|--------------------------|-------------------|
| 1M KOH (before bubbling) | 13.9              |
| 100% CO <sub>2</sub>     | 7.55 <sup>a</sup> |
| Air-CO <sub>2</sub>      | 7.90 <sup>a</sup> |

<sup>a</sup>The pH of the 1M KOH solution after CO<sub>2</sub> capture. In a typical experiment, the pH was measured with 100 ml of KOH solution after purging with CO<sub>2</sub> containing gas at 30 sccm overnight.



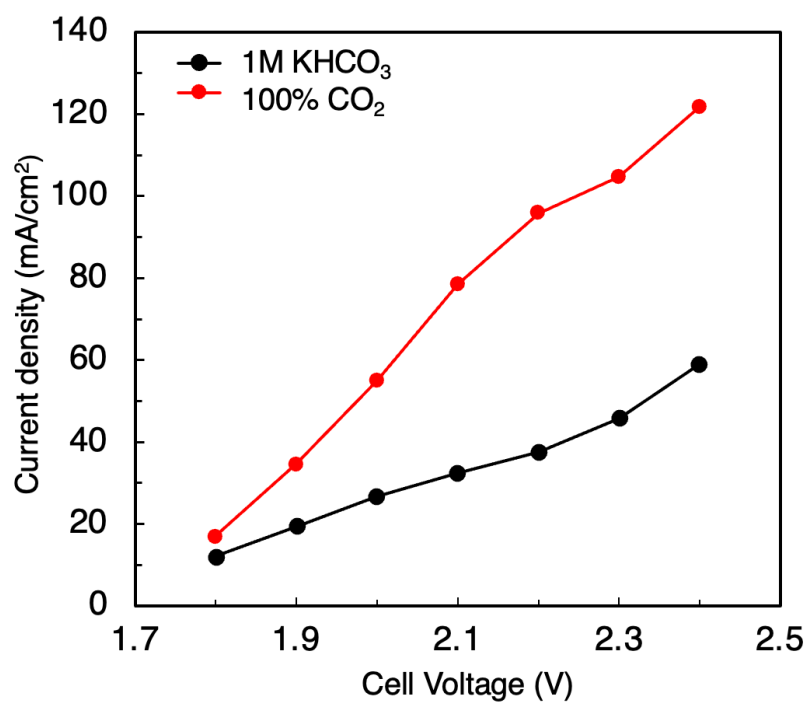

**Figure S6.** Current densities in CO<sub>2</sub>RR using 1M BCS and 100 % CO<sub>2</sub> on Ag MEA-Cell.

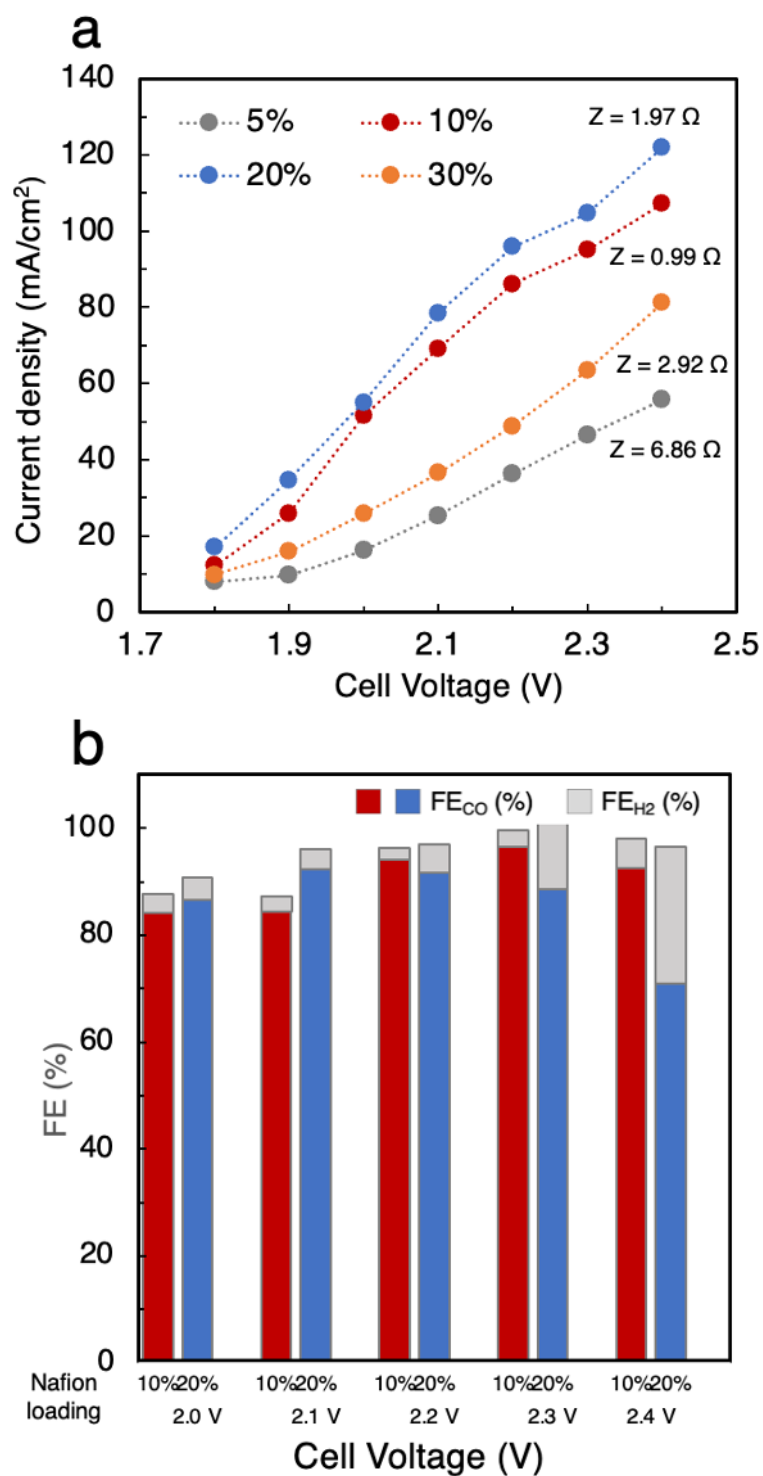

**Figure S7.** (a) Current-voltage curves and (b) Faradaic efficiency for CO ( $\text{FE}_{\text{CO}}$ ) and  $\text{H}_2$  production ( $\text{FE}_{\text{H}_2}$ ) in  $\text{CO}_2$ RR using pure  $\text{CO}_2$  on Ag MEA-Cell with Ag catalysts including different ratio of Nafion solution.

The Nafion ionomers contained in the Ag catalyst ink enhance transport of CO<sub>2</sub> and H<sup>+</sup> at the catalytic sites.<sup>45, 46</sup> Thus, we examined the optimal loading amount of the Nafion ionomer from 5 to 30 % and found that MEAs with 10 to 20 wt% of Nafion loading to the amount of Ag on Ag-MEA (2.5 mg/cm<sup>2</sup>) showed higher *J* values, which were almost double than those on MEAs with 5 or 30 wt% Nafion loading in the voltage range from 2.0 to 2.4 V (Figure S6a). The resistances for CO<sub>2</sub>RR using MEAs with 5 or 30 % Nafion loading were measured to be 6.86 and 2.92 Ω, respectively, and the resistances were much higher than that with MEAs with 10 or 20 % Nafion loading (0.99 and 1.97 Ω). The lower *J* with MEAs employing 5 or 30 % Nafion loading is possibly assigned to the higher resistances of the MEAs. MEAs characterized with 10 to 20 wt% of Nafion loading to the Ag amount showed similar FE<sub>CO</sub>, more than 80% between 2.0 and 2.3 V. At 10 wt% of the optimal Nafion content, we achieved FE<sub>CO</sub>=97% at 2.3 V and *J*=100 mA/cm<sup>2</sup> (Figures S6b and S7a).

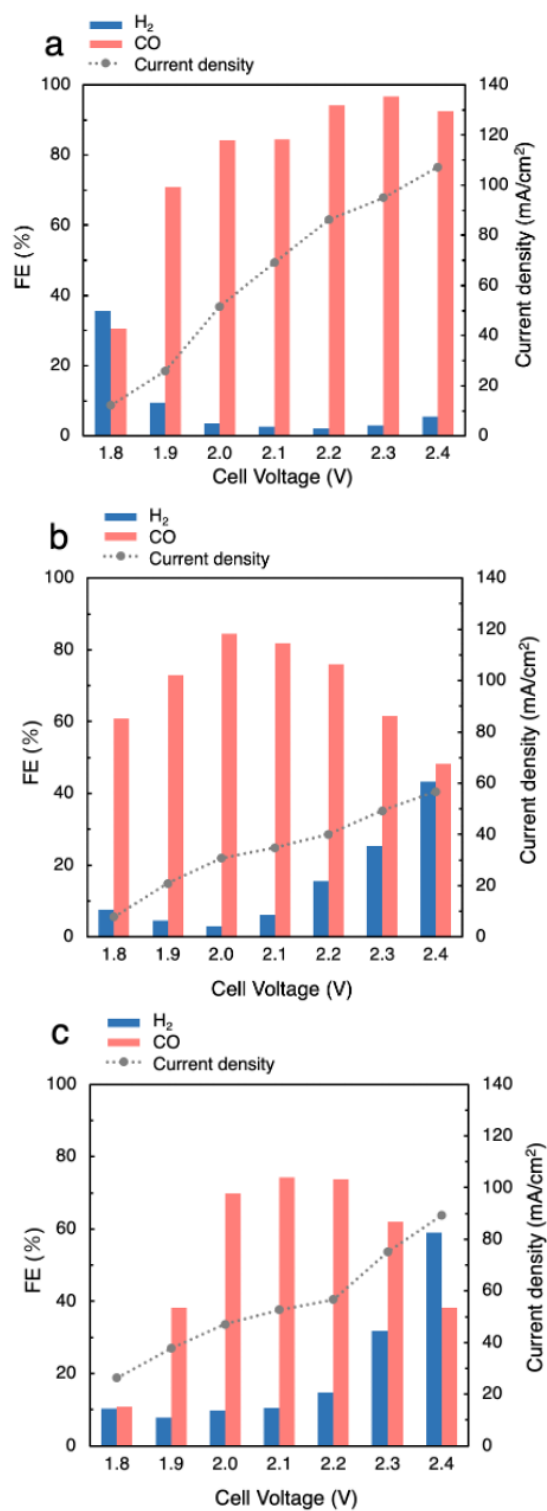

**Figure S8.** Faradaic efficiency (FE) and current density in CO<sub>2</sub>RR using (a) 100% CO<sub>2</sub>, (b) N<sub>2</sub>-CO<sub>2</sub> and (c) Air-CO<sub>2</sub> on Ag MEA-Cell with 10% Nafion loading MEA.

**Table S3.** Comparison of total current density ( $J$ ), partial current density ( $J_{\text{CO}}$ ) and  $\text{FE}_{\text{CO}}$  for CO production in state-of-the-art  $\text{CO}_2\text{RR}$  using BCS combined CCU systems.

| Feedstock                                       | Catalyst | Membrane | $\text{FE}_{\text{CO}}$ | $J$<br>( $\text{mA}/\text{cm}^2$ ) | $J_{\text{CO}}$<br>( $\text{mA}/\text{cm}^2$ ) | Ref       |
|-------------------------------------------------|----------|----------|-------------------------|------------------------------------|------------------------------------------------|-----------|
| Sat. $\text{CO}_2$ gas<br>1.0 M KOH             | Ag       | CEM      | >99%                    | 73                                 | 73                                             | This work |
| Sat. $\text{CO}_2$ gas<br>1.0 M KOH             | Ag       | CEM      | 93%                     | 105                                | 97                                             | This work |
| 2M $\text{KHCO}_3$                              | Ag       | CEM      | 99%                     | 52                                 | 51                                             | This work |
| 3M $\text{KHCO}_3$                              | Ag       | BPM      | 62%                     | 200                                | 124                                            | S1        |
| 3M $\text{KHCO}_3$                              | Ag       | BPM      | 82%                     | 100                                | 82                                             | S1        |
| 3M $\text{KHCO}_3$                              | Ag       | BPM      | 59%                     | 100                                | 59                                             | S2        |
| Sat. $\text{N}_2$ gas<br>3.0 M $\text{KHCO}_3$  | Ag       | BPM      | 37%                     | 100                                | 37                                             | S3        |
| Sat. $\text{CO}_2$ gas<br>3.0 M $\text{KHCO}_3$ | Ag       | BPM      | 35%                     | 100                                | 35                                             | S3        |
| 1.25 M $\text{HCO}_3^-$                         | Ag       | CEM      | 18%                     | 104                                | 19                                             | S4        |

## References

- S1 E. W. Lees, M. Goldman, A. G. Fink, D. J. Dvorak, D. A. Salvatore, Z. Zhang, N. W. X. Loo, C. P. Berlinguette, *ACS Energy Lett.*, 2020, **5**, 2165–2173.
- S2 Z. Zhang, E.W. Lees, F. Habibzadeh, D. A. Salvatore, S. Ren, G. L. Simpson, D. G. Wheeler, A. Liu, C. P. Berlinguette, *Energy Environ. Sci.*, 2022, **15**, 705–713.
- S3 T. Li, E. W. Lees, M. Goldman, D. A. Salvatore, D. M. Weekes, C. P. Berlinguette, *Joule*, 2019, **3**, 1487–1497.
- S4 L. A. Diaz, N. Gao, B. Adhikari, T. E. Lister, E. J. Dufek, A. D. Wilson, *Green Chem.*, 2018, **20**, 620–626.
